# Supplementary material for: Ginkgetin attenuates bone loss in OVX mice by inhibiting the NF-κB/IκBα signaling pathway
Source: PeerJ. 2024 Jul 10;12:e17722. doi: 10.7717/peerj.17722 (PMC11246017; doi:10.7717/peerj.17722)
Supplement: Supplemental Information 2 [file peerj-12-17722-s002.xls]

## Sheet: Sheet1
ITEM TO CHECK	IMPORTANCE	CHECKLIST
EXPERIMENTAL DESIGN
Definition of experimental and control groups	E	Page 4/Line 111
Number within each group	E	Page 4/Line 111
Assay carried out by core lab or investigator's lab?	D
Acknowledgement of authors' contributions	D
SAMPLE
Description	E	Page 5/Line 129
Volume/mass of sample processed	D
Microdissection or macrodissection	E	Page 5/Line 160
Processing procedure	E	Page 5/Line 145
If frozen - how and how quickly?	E
If fixed - with what, how quickly?	E	Page 5/Line 153
Sample storage conditions and duration (especially for FFPE samples)	E	Page 5/Line 155
NUCLEIC ACID EXTRACTION
Procedure and/or instrumentation	E	Page 5/Line 161
Name of kit and details of any modifications	E	Page 5/Line 161
Source of additional reagents used	D
Details of DNase or RNAse treatment	E	Page 6/Line 166
Contamination assessment (DNA or RNA)	E
Nucleic acid quantification	E	Page 6/Line 168
Instrument and method	E	Page 6/Line 168
Purity (A260/A280)	D
Yield	D
RNA integrity method/instrument	E	Page 6/Line 173
RIN/RQI or Cq of 3' and 5' transcripts	E	Page 6/Line 173
Electrophoresis traces	D
Inhibition testing (Cq dilutions, spike or other)	E	Page 6/Line 167
REVERSE TRANSCRIPTION
Complete reaction conditions	E	Page 6/Line 165
Amount of RNA and reaction volume	E	Page 6/Line 168
Priming oligonucleotide (if using GSP) and concentration	E	Page 6/Line 166
Reverse transcriptase and concentration	E	Page 6/Line 168
Temperature and time	E	Page 6/Line 169
Manufacturer of reagents and catalogue numbers	D
Cqs with and without RT	D*
Storage conditions of cDNA	D
qPCR TARGET INFORMATION
If multiplex, efficiency and LOD of each assay.	E
Sequence accession number	E
Location of amplicon	D
Amplicon length	E
In silico specificity screen (BLAST, etc)	E
Pseudogenes, retropseudogenes or other homologs?	D
Sequence alignment	D
Secondary structure analysis of amplicon	D
Location of each primer by exon or intron (if applicable)	E
What splice variants are targeted?	E
qPCR OLIGONUCLEOTIDES
Primer sequences	E
RTPrimerDB Identification Number	D
Probe sequences	D**
Location and identity of any modifications	E
Manufacturer of oligonucleotides	D
Purification method	D
qPCR PROTOCOL
Complete reaction conditions	E
Reaction volume and amount of cDNA/DNA	E
Primer, (probe), Mg++ and dNTP concentrations	E
Polymerase identity and concentration	E
Buffer/kit identity and manufacturer	E
Exact chemical constitution of the buffer	D
Additives (SYBR Green I, DMSO, etc.)	E
Manufacturer of plates/tubes and catalog number	D
Complete thermocycling parameters	E
Reaction setup (manual/robotic)	D
Manufacturer of qPCR instrument	E
qPCR VALIDATION
Evidence of optimisation (from gradients)	D
Specificity (gel, sequence, melt, or digest)	E
For SYBR Green I, Cq of the NTC	E
Standard curves with slope and y-intercept	E
PCR efficiency calculated from slope	E
Confidence interval for PCR efficiency or standard error	D
r2 of standard curve	E
Linear dynamic range	E
Cq variation at lower limit	E
Confidence intervals throughout range	D
Evidence for limit of detection	E
If multiplex, efficiency and LOD of each assay.	E
DATA ANALYSIS
qPCR analysis program (source, version)	E	Page 6/Line 173
Cq method determination	E	Page 6/Line 173
Outlier identification and disposition	E	Page 6/Line 173
Results of NTCs	E	Page 8/Line 247
Justification of number and choice of reference genes	E	Page 11/Line 310
Description of normalisation method	E	Page 6/Line 205
Number and concordance of biological replicates	D
Number and stage (RT or qPCR) of technical replicates	E	Figure 5
Repeatability (intra-assay variation)	E	Figure 5
Reproducibility (inter-assay variation, %CV)	D
Power analysis	D
Statistical methods for result significance	E	Page 6/Line 205
Software (source, version)	E	Page 6/Line 206
Cq or raw data submission using RDML	D
Table 1. MIQE checklist for authors, reviewers and editors. All essential information (E) must be submitted with the manuscript. Desirable
information (D) should be submitted if available. If using primers obtained from RTPrimerDB, information on qPCR target, oligonucleotides,
protocols and validation is available from that source.
*: Assessing the absence of DNA using a no RT assay is essential when first extracting RNA. Once the sample has been validated as
RDNA-free, inclusion of a no-RT control is desirable, but no longer essential.
**: Disclosure of the probe sequence is highly desirable and strongly encouraged. However, since not all commercial pre-designed assay
vendors provide this information, it cannot be an essential requirement. Use of such assays is advised against.
